# Supplementary material for: Biocontrol of invasive pheretimoid earthworms using Beauveria bassiana
Source: PeerJ. 2021 Apr 7;9:e11101. doi: 10.7717/peerj.11101 (PMC8035901; doi:10.7717/peerj.11101)
Supplement: Supplemental Information 1 — Bioassay 1, 2, and 3 results. [file peerj-09-11101-s001.xlsx]

## Sheet: Assay 1
Treatments	Replication	Survivals	AdultNO	Adult (%)	Mortality (100%)
C1	1	6	0	0	0
C1	2	6	0	0	0
C1	3	5	0	0	0.166667
C1	4	4	0	0	0.333333
C1	5	6	0	0	0
C1	6	4	0	0	0.333333
C1	7	5	0	0	0.166667
C1	8	5	0	0	0.166667
C1	9	6	0	0	0
C1	10	6	0	0	0
C1	11	3	0	0	0.5
C1	12	3	0	0	0.5
C1	13	4	0	0	0.333333
C1	14	5	0	0	0.166667
C1	15	2	0	0	0.666667
C2	1	5	0	0	0.166667
C2	2	6	0	0	0
C2	3	6	0	0	0
C2	4	6	0	0	0
C2	5	6	0	0	0
C2	6	6	0	0	0
C2	7	6	0	0	0
C2	8	6	0	0	0
C2	9	6	0	0	0
C2	10	6	0	0	0
C2	11	6	0	0	0
C2	12	6	0	0	0
C2	13	6	0	0	0
C2	14	6	0	0	0
C2	15	6	0	0	0
C3	1	4	6	100	0.333333
C3	2	6	6	100	0
C3	3	4	6	100	0.333333
C3	4	6	6	100	0
C3	5	5	6	100	0.166667
C3	6	6	6	100	0
C3	7	5	6	100	0.166667
C3	8	6	6	100	0
C3	9	6	6	100	0
C3	10	4	6	100	0.333333
C3	11	3	6	100	0.5
C3	12	6	6	100	0
C3	13	6	6	100	0
C3	14	6	0	0	0
C3	15	6	0	0	0
B. bassiana	1	1	0	0	0.833333
B. bassiana	2	2	0	0	0.666667
B. bassiana	3	3	0	0	0.5
B. bassiana	4	1	0	0	0.833333
B. bassiana	5	0	0	0	1
B. bassiana	6	3	0	0	0.5
B. bassiana	7	5	0	0	0.166667
B. bassiana	8	1	0	0	0.833333
B. bassiana	9	1	0	0	0.833333
B. bassiana	10	1	0	0	0.833333
B. bassiana	11	2	0	0	0.666667
B. bassiana	12	2	0	0	0.666667
B. bassiana	13	1	0	0	0.833333
B. bassiana	14	0	0	0	1
B. bassiana	15	2	0	0	0.666667
Mycotized millet 15g	1	1	0	0	0.833333
Mycotized millet 15g	2	4	0	0	0.333333
Mycotized millet 15g	3	2	0	0	0.666667
Mycotized millet 15g	4	1	0	0	0.833333
Mycotized millet 15g	5	0	0	0	1
Mycotized millet 15g	6	0	0	0	1
Mycotized millet 15g	7	2	0	0	0.666667
Mycotized millet 15g	8	2	0	0	0.666667
Mycotized millet 15g	9	0	0	0	1
Mycotized millet 15g	10	1	0	0	0.833333
Mycotized millet 15g	11	0	0	0	1
Mycotized millet 15g	12	3	0	0	0.5
Mycotized millet 15g	13	0	0	0	1
Mycotized millet 15g	14	3	0	0	0.5
Mycotized millet 15g	15	1	0	0	0.833333
Mycotized millet 25g	1	3	0	0	0.5
Mycotized millet 25g	2	0	0	0	1
Mycotized millet 25g	3	4	0	0	0.333333
Mycotized millet 25g	4	0	0	0	1
Mycotized millet 25g	5	0	0	0	1
Mycotized millet 25g	6	0	0	0	1
Mycotized millet 25g	7	3	0	0	0.5
Mycotized millet 25g	8	1	0	0	0.833333
Mycotized millet 25g	9	0	0	0	1
Mycotized millet 25g	10	2	0	0	0.666667
Mycotized millet 25g	11	4	0	0	0.333333
Mycotized millet 25g	12	1	0	0	0.833333
Mycotized millet 25g	13	2	0	0	0.666667
Mycotized millet 25g	14	0	0	0	1
Mycotized millet 25g	15	1	0	0	0.833333

## Sheet: Assay 2
Treatments	No.of-earthworms	Earthworm-weight(g)	No.of-adult	Date	Group	Adults	Mortality
C1	6	4	0	A	1	0	0.142857
C1	6	4.5	0	A	1	0	0.142857
C1	7	5.5	0	A	1	0	0
C1	6	4.8	0	A	1	0	0.142857
C1	7	6.8	0	A	1	0	0
C1	7	6.5	0	A	1	0	0
C1	6	6.5	0	A	1	0	0.142857
C1	1	0.6	0	A	1	0	0.857143
C1	8	7.5	0	A	1	0	0
C1	7	6	0	A	1	0	0
C1	6	4.5	0	A	1	0	0.142857
C1	7	5.6	0	A	1	0	0
C1	6	6.2	0	A	1	0	0.142857
C1	5	3.5	0	A	1	0	0.285714
C1	7	5.2	0	A	1	0	0
C2-Millet15	6	13.9	0	A	2	0	0.142857
C2-Millet15	6	19.7	0	A	2	0	0.142857
C2-Millet15	6	15.8	0	A	2	0	0.142857
C2-Millet15	6	13.5	0	A	2	0	0.142857
C2-Millet15	7	15.7	0	A	2	0	0
C2-Millet15	8	15.7	0	A	2	0	0
C2-Millet15	6	14.4	0	A	2	0	0.142857
C2-Millet15	7	19.3	0	A	2	0	0
C2-Millet15	7	13.7	0	A	2	0	0
C2-Millet15	8	13.2	0	A	2	0	0
C2-Millet15	7	14.2	0	A	2	0	0
C2-Millet15	8	15.4	0	A	2	0	0
C2-Millet15	7	13.4	0	A	2	0	0
C2-Millet15	3	7.6	0	A	2	0	0.571429
C2-Millet15	7	18.6	0	A	2	0	0
C3-Millet25	7	16.7	0	A	3	0	0
C3-Millet25	2	16	0	A	3	0	0.714286
C3-Millet25	7	17.6	0	A	3	0	0
C3-Millet25	6	15.2	0	A	3	0	0.142857
C3-Millet25	7	16.6	0	A	3	0	0
C3-Millet25	7	18.4	0	A	3	0	0
C3-Millet25	8	18.7	0	A	3	0	0
C3-Millet25	6	15.6	0	A	3	0	0.142857
C3-Millet25	6	13.3	0	A	3	0	0.142857
C3-Millet25	7	18.1	0	A	3	0	0
C3-Millet25	7	14.8	0	A	3	0	0
C3-Millet25	7	22.3	0	A	3	0	0
C3-Millet25	8	18.8	0	A	3	0	0
C3-Millet25	8	18.3	0	A	3	0	0
C3-Millet25	5	12.2	0	A	3	0	0.285714
T1-B.b	8	5.8	0	A	1	0	0
T1-B.b	7	6.2	0	A	1	0	0
T1-B.b	7	5.3	0	A	1	0	0
T1-B.b	7	5.5	0	A	1	0	0
T1-B.b	8	5.9	0	A	1	0	0
T1-B.b	7	5.1	0	A	1	0	0
T1-B.b	7	5	0	A	1	0	0
T1-B.b	5	4	0	A	1	0	0.285714
T1-B.b	5	3.8	0	A	1	0	0.285714
T1-B.b	7	6.3	0	A	1	0	0
T1-B.b	7	5	0	A	1	0	0
T1-B.b	8	6.1	0	A	1	0	0
T1-B.b	8	5	0	A	1	0	0
T1-B.b	5	3.8	0	A	1	0	0.285714
T1-B.b	7	5	0	A	1	0	0
T2-Millet15	7	7.7	0	A	2	0	0
T2-Millet15	7	8.6	0	A	2	0	0
T2-Millet15	7	10.6	0	A	2	0	0
T2-Millet15	1	1.5	0	A	2	0	0.857143
T2-Millet15	8	9	0	A	2	0	0
T2-Millet15	8	9.8	0	A	2	0	0
T2-Millet15	6	6.1	0	A	2	0	0.142857
T2-Millet15	7	9.3	0	A	2	0	0
T2-Millet15	7	6.2	0	A	2	0	0
T2-Millet15	8	8	0	A	2	0	0
T2-Millet15	6	4.8	0	A	2	0	0.142857
T2-Millet15	7	10.2	0	A	2	0	0
T2-Millet15	7	8.2	0	A	2	0	0
T2-Millet15	7	8.7	0	A	2	0	0
T2-Millet15	7	6.8	0	A	2	0	0
T3-Millet25	6	10.5	0	A	3	0	0.142857
T3-Millet25	6	10	0	A	3	0	0.142857
T3-Millet25	4	6.7	0	A	3	0	0.428571
T3-Millet25	7	14.9	0	A	3	0	0
T3-Millet25	8	11.3	0	A	3	0	0
T3-Millet25	3	2.3	0	A	3	0	0.571429
T3-Millet25	7	7.7	0	A	3	0	0
T3-Millet25	4	5.4	0	A	3	0	0.428571
T3-Millet25	6	9.6	0	A	3	0	0.142857
T3-Millet25	6	12.2	0	A	3	0	0.142857
T3-Millet25	8	9.3	0	A	3	0	0
T3-Millet25	8	8.9	0	A	3	0	0
T3-Millet25	6	11.3	0	A	3	0	0.142857
T3-Millet25	7	12.5	0	A	3	0	0
T3-Millet25	8	15.4	0	A	3	0	0
T4-Alfalfa50	4	7.2	0	A	1	0	0.428571
T4-Alfalfa50	7	12.3	0	A	1	0	0
T4-Alfalfa50	8	21.2	0	A	1	0	0
T4-Alfalfa50	6	20.3	4	A	1	57.1429	0.142857
T4-Alfalfa50	7	24.7	2	A	1	28.5714	0
T4-Alfalfa50	5	13.7	2	A	1	28.5714	0.285714
T4-Alfalfa50	7	17.7	4	A	1	57.1429	0
T4-Alfalfa50	6	20.3	6	A	1	85.7143	0.142857
T4-Alfalfa50	7	17.5	0	A	1	0	0
T4-Alfalfa50	7	19	0	A	1	0	0
T4-Alfalfa50	8	19.8	0	A	1	0	0
T4-Alfalfa50	7	17.6	3	A	1	42.8571	0
T4-Alfalfa50	6	12.7	1	A	1	14.2857	0.142857
T4-Alfalfa50	8	23.9	0	A	1	0	0
T4-Alfalfa50	7	11	0	A	1	0	0
C1	5	4.19	0	B	1	0	0.285714
C1	5	5.31	0	B	1	0	0.285714
C1	6	6.16	0	B	1	0	0.142857
C1	6	5.17	0	B	1	0	0.142857
C1	7	7.21	0	B	1	0	0
C1	7	7.04	0	B	1	0	0
C1	1	1.3	0	B	1	0	0.857143
C1	6	5.79	0	B	1	0	0.142857
C1	7	6.47	0	B	1	0	0
C1	5	7.25	0	B	1	0	0.285714
C1	6	6.01	0	B	1	0	0.142857
C1	7	6.2	0	B	1	0	0
C1	6	6.4	0	B	1	0	0.142857
C1	5	5.4	0	B	1	0	0.285714
C1	6	5.11	0	B	1	0	0.142857
C2-Millet15	5	11.2	0	B	2	0	0.285714
C2-Millet15	6	20.78	0	B	2	0	0.142857
C2-Millet15	6	14.72	5	B	2	71.4286	0.142857
C2-Millet15	6	14.78	3	B	2	42.8571	0.142857
C2-Millet15	7	15.45	1	B	2	14.2857	0
C2-Millet15	8	17.02	0	B	2	0	0
C2-Millet15	6	21.93	0	B	2	0	0.142857
C2-Millet15	7	22.71	2	B	2	28.5714	0
C2-Millet15	7	14.95	0	B	2	0	0
C2-Millet15	8	9.81	0	B	2	0	0
C2-Millet15	6	14.32	0	B	2	0	0.142857
C2-Millet15	8	15.35	0	B	2	0	0
C2-Millet15	7	12.85	3	B	2	42.8571	0
C2-Millet15	2	8.2	2	B	2	28.5714	0.714286
C2-Millet15	7	20.1	0	B	2	0	0
C3-Millet25	3	16.89	0	B	3	0	0.571429
C3-Millet25	5	17.05	1	B	3	14.2857	0.285714
C3-Millet25	7	18.78	2	B	3	28.5714	0
C3-Millet25	6	18.14	2	B	3	28.5714	0.142857
C3-Millet25	7	17.48	4	B	3	57.1429	0
C3-Millet25	6	17.15	5	B	3	71.4286	0.142857
C3-Millet25	8	18.06	5	B	3	71.4286	0
C3-Millet25	5	12.026	0	B	3	0	0.285714
C3-Millet25	6	15.63	0	B	3	0	0.142857
C3-Millet25	7	20.64	1	B	3	14.2857	0
C3-Millet25	7	16.69	3	B	3	42.8571	0
C3-Millet25	7	25.16	4	B	3	57.1429	0
C3-Millet25	8	17.6	7	B	3	100	0
C3-Millet25	8	18.21	5	B	3	71.4286	0
C3-Millet25	5	14.68	3	B	3	42.8571	0.285714
T1-B.b	7	5.37	0	B	1	0	0
T1-B.b	7	6.85	0	B	1	0	0
T1-B.b	7	5.47	0	B	1	0	0
T1-B.b	8	5.51	0	B	1	0	0
T1-B.b	7	4.86	0	B	1	0	0
T1-B.b	6	3.8	0	B	1	0	0.142857
T1-B.b	6	3.95	0	B	1	0	0.142857
T1-B.b	4	5.23	0	B	1	0	0.428571
T1-B.b	5	4.72	0	B	1	0	0.285714
T1-B.b	6	5.72	0	B	1	0	0.142857
T1-B.b	7	5.44	0	B	1	0	0
T1-B.b	8	6.26	0	B	1	0	0
T1-B.b	5	3.86	0	B	1	0	0.285714
T1-B.b	5	4.7	0	B	1	0	0.285714
T1-B.b	7	5.92	0	B	1	0	0
T2-Millet15	7	10.45	0	B	2	0	0
T2-Millet15	7	10.56	0	B	2	0	0
T2-Millet15	7	11.4	0	B	2	0	0
T2-Millet15	1	2.88	0	B	2	0	0.857143
T2-Millet15	8	10.2	0	B	2	0	0
T2-Millet15	6	10.72	0	B	2	0	0.142857
T2-Millet15	6	7.97	0	B	2	0	0.142857
T2-Millet15	7	11.36	0	B	2	0	0
T2-Millet15	7	8.14	1	B	2	14.2857	0
T2-Millet15	8	9.74	0	B	2	0	0
T2-Millet15	6	7.26	0	B	2	0	0.142857
T2-Millet15	6	10.72	1	B	2	14.2857	0.142857
T2-Millet15	7	11	0	B	2	0	0
T2-Millet15	7	10.89	0	B	2	0	0
T2-Millet15	6	8.98	0	B	2	0	0.142857
T3-Millet25	6	14.48	3	B	3	42.8571	0.142857
T3-Millet25	6	14.25	0	B	3	0	0.142857
T3-Millet25	4	9.61	0	B	3	0	0.428571
T3-Millet25	7	17.89	0	B	3	0	0
T3-Millet25	8	14.74	0	B	3	0	0
T3-Millet25	3	4.84	0	B	3	0	0.571429
T3-Millet25	7	11.82	0	B	3	0	0
T3-Millet25	4	8	0	B	3	0	0.428571
T3-Millet25	5	12.12	3	B	3	42.8571	0.285714
T3-Millet25	6	15.71	4	B	3	57.1429	0.142857
T3-Millet25	8	12.76	0	B	3	0	0
T3-Millet25	8	13.82	0	B	3	0	0
T3-Millet25	6	14.12	1	B	3	14.2857	0.142857
T3-Millet25	7	14.98	3	B	3	42.8571	0
T3-Millet25	8	27.83	2	B	3	28.5714	0
T4-Alfalfa50	4	7.38	2	B	1	28.5714	0.428571
T4-Alfalfa50	7	15.14	5	B	1	71.4286	0
T4-Alfalfa50	8	20.82	6	B	1	85.7143	0
T4-Alfalfa50	7	23.7	7	B	1	100	0
T4-Alfalfa50	7	26.27	7	B	1	100	0
T4-Alfalfa50	5	14.28	5	B	1	71.4286	0.285714
T4-Alfalfa50	7	21.81	7	B	1	100	0
T4-Alfalfa50	6	24.36	6	B	1	85.7143	0.142857
T4-Alfalfa50	6	15.71	4	B	1	57.1429	0.142857
T4-Alfalfa50	7	17.77	3	B	1	42.8571	0
T4-Alfalfa50	8	19.03	8	B	1	114.286	0
T4-Alfalfa50	7	21.71	7	B	1	100	0
T4-Alfalfa50	6	16.87	6	B	1	85.7143	0.142857
T4-Alfalfa50	8	28.9	8	B	1	114.286	0
T4-Alfalfa50	7	16.13	4	B	1	57.1429	0
C1	5	4.17	0	C	1	0	0.285714
C1	4	4.82	0	C	1	0	0.428571
C1	7	5.95	0	C	1	0	0
C1	5	5.02	0	C	1	0	0.285714
C1	7	6.81	0	C	1	0	0
C1	7	6.42	0	C	1	0	0
C1	6	5.99	0	C	1	0	0.142857
C1	1	1.29	0	C	1	0	0.857143
C1	7	5.85	0	C	1	0	0
C1	6	6.48	0	C	1	0	0.142857
C1	6	5.5	0	C	1	0	0.142857
C1	7	6.38	0	C	1	0	0
C1	5	5.43	0	C	1	0	0.285714
C1	5	5.47	0	C	1	0	0.285714
C1	6	5.07	0	C	1	0	0.142857
C2-Millet15	5	11.89	2	C	2	28.5714	0.285714
C2-Millet15	6	17.34	0	C	2	0	0.142857
C2-Millet15	6	13.15	5	C	2	71.4286	0.142857
C2-Millet15	6	12.34	4	C	2	57.1429	0.142857
C2-Millet15	7	12.4	6	C	2	85.7143	0
C2-Millet15	8	13.44	2	C	2	28.5714	0
C2-Millet15	6	18.94	4	C	2	57.1429	0.142857
C2-Millet15	6	15.86	4	C	2	57.1429	0.142857
C2-Millet15	6	12.4	0	C	2	0	0.142857
C2-Millet15	4	4.32	0	C	2	0	0.428571
C2-Millet15	6	12.16	3	C	2	42.8571	0.142857
C2-Millet15	7	10.34	1	C	2	14.2857	0
C2-Millet15	7	11.69	6	C	2	85.7143	0
C2-Millet15	2	9.13	2	C	2	28.5714	0.714286
C2-Millet15	7	16.86	2	C	2	28.5714	0
C3-Millet25	5	10.55	2	C	3	28.5714	0.285714
C3-Millet25	3	8.4	3	C	3	42.8571	0.571429
C3-Millet25	6	15.07	4	C	3	57.1429	0.142857
C3-Millet25	5	12.94	4	C	3	57.1429	0.285714
C3-Millet25	6	13.65	6	C	3	85.7143	0.142857
C3-Millet25	6	13.4	6	C	3	85.7143	0.142857
C3-Millet25	8	13.96	6	C	3	85.7143	0
C3-Millet25	5	11.85	4	C	3	57.1429	0.285714
C3-Millet25	6	15.19	4	C	3	57.1429	0.142857
C3-Millet25	7	17.5	6	C	3	85.7143	0
C3-Millet25	7	14.09	5	C	3	71.4286	0
C3-Millet25	7	20.15	7	C	3	100	0
C3-Millet25	8	14.02	8	C	3	114.286	0
C3-Millet25	8	14.77	7	C	3	100	0
C3-Millet25	5	9.75	4	C	3	57.1429	0.285714
T1-B.b	7	5.2	0	C	1	0	0
T1-B.b	6	5.7	0	C	1	0	0.142857
T1-B.b	5	4.26	0	C	1	0	0.285714
T1-B.b	7	5.26	0	C	1	0	0
T1-B.b	5	4.52	0	C	1	0	0.285714
T1-B.b	5	3.25	0	C	1	0	0.285714
T1-B.b	4	2.62	0	C	1	0	0.428571
T1-B.b	4	5.24	0	C	1	0	0.428571
T1-B.b	4	4	0	C	1	0	0.428571
T1-B.b	5	4.99	0	C	1	0	0.285714
T1-B.b	7	5.64	0	C	1	0	0
T1-B.b	8	6.31	0	C	1	0	0
T1-B.b	6	4.49	0	C	1	0	0.142857
T1-B.b	5	4.73	0	C	1	0	0.285714
T1-B.b	6	5.22	0	C	1	0	0.142857
T2-Millet15	7	9.46	0	C	2	0	0
T2-Millet15	7	10.55	0	C	2	0	0
T2-Millet15	7	9.92	0	C	2	0	0
T2-Millet15	1	3.5	0	C	2	0	0.857143
T2-Millet15	7	8.3	0	C	2	0	0
T2-Millet15	6	12.61	1	C	2	14.2857	0.142857
T2-Millet15	4	5.5	0	C	2	0	0.428571
T2-Millet15	6	9.63	0	C	2	0	0.142857
T2-Millet15	8	9.24	0	C	2	0	0
T2-Millet15	8	8.92	0	C	2	0	0
T2-Millet15	6	7.92	0	C	2	0	0.142857
T2-Millet15	6	12.7	2	C	2	28.5714	0.142857
T2-Millet15	7	9.28	0	C	2	0	0
T2-Millet15	7	9.53	1	C	2	14.2857	0
T2-Millet15	5	8.14	0	C	2	0	0.285714
T3-Millet25	6	14.99	4	C	3	57.1429	0.142857
T3-Millet25	6	15.44	4	C	3	57.1429	0.142857
T3-Millet25	4	13.15	4	C	3	57.1429	0.428571
T3-Millet25	7	16.51	6	C	3	85.7143	0
T3-Millet25	7	13.97	2	C	3	28.5714	0
T3-Millet25	3	6.3	1	C	3	14.2857	0.571429
T3-Millet25	7	14.46	0	C	3	0	0
T3-Millet25	4	10.19	2	C	3	28.5714	0.428571
T3-Millet25	5	13.36	5	C	3	71.4286	0.285714
T3-Millet25	6	15.23	5	C	3	71.4286	0.142857
T3-Millet25	7	13.9	4	C	3	57.1429	0
T3-Millet25	7	14.66	0	C	3	0	0
T3-Millet25	6	14.01	6	C	3	85.7143	0.142857
T3-Millet25	7	13.18	7	C	3	100	0
T3-Millet25	8	12.1	3	C	3	42.8571	0
T4-Alfalfa50	4	5.32	2	C	1	28.5714	0.428571
T4-Alfalfa50	7	16.56	7	C	1	100	0
T4-Alfalfa50	7	16.34	7	C	1	100	0
T4-Alfalfa50	6	21.36	6	C	1	85.7143	0.142857
T4-Alfalfa50	7	23.38	7	C	1	100	0
T4-Alfalfa50	5	14.84	5	C	1	71.4286	0.285714
T4-Alfalfa50	7	21.09	7	C	1	100	0
T4-Alfalfa50	6	19.02	6	C	1	85.7143	0.142857
T4-Alfalfa50	6	16.03	5	C	1	71.4286	0.142857
T4-Alfalfa50	7	19.43	7	C	1	100	0
T4-Alfalfa50	8	15.91	8	C	1	114.286	0
T4-Alfalfa50	7	20.13	7	C	1	100	0
T4-Alfalfa50	6	16.41	6	C	1	85.7143	0.142857
T4-Alfalfa50	8	21.79	8	C	1	114.286	0
T4-Alfalfa50	7	15.65	6	C	1	85.7143	0

## Sheet: Assay 3
Treatments	survivals	adultsNO	Date	DayCount	Adults	Mortality	mortality (%)
B.bassiana	7	0	2020-09-01	1	0	0	0
B.bassiana	7	0	2020-09-01	1	0	0	0
B.bassiana	7	0	2020-09-01	1	0	0	0
B.bassiana	7	0	2020-09-01	1	0	0	0
B.bassiana	7	0	2020-09-01	1	0	0	0
B.bassiana	7	0	2020-09-01	1	0	0	0
B.bassiana	7	0	2020-09-01	1	0	0	0
B.bassiana	7	0	2020-09-01	1	0	0	0
B.bassiana	7	0	2020-09-01	1	0	0	0
B.bassiana	7	0	2020-09-01	1	0	0	0
B.bassiana	7	0	2020-09-01	1	0	0	0
B.bassiana	7	0	2020-09-01	1	0	0	0
B.bassiana	7	0	2020-09-01	1	0	0	0
B.bassiana	7	0	2020-09-01	1	0	0	0
B.bassiana	7	0	2020-09-01	1	0	0	0
BotaniGard	6	0	2020-09-01	1	0	1	0.142857
BotaniGard	6	4	2020-09-01	1	57.1429	1	0.142857
BotaniGard	5	0	2020-09-01	1	0	2	0.285714
BotaniGard	6	0	2020-09-01	1	0	1	0.142857
BotaniGard	6	1	2020-09-01	1	14.2857	1	0.142857
BotaniGard	6	0	2020-09-01	1	0	1	0.142857
BotaniGard	6	2	2020-09-01	1	28.5714	1	0.142857
BotaniGard	6	0	2020-09-01	1	0	1	0.142857
BotaniGard	4	2	2020-09-01	1	28.5714	3	0.428571
BotaniGard	7	2	2020-09-01	1	28.5714	0	0
BotaniGard	6	0	2020-09-01	1	0	1	0.142857
BotaniGard	7	4	2020-09-01	1	57.1429	0	0
BotaniGard	6	1	2020-09-01	1	14.2857	1	0.142857
BotaniGard	5	0	2020-09-01	1	0	2	0.285714
BotaniGard	5	1	2020-09-01	1	14.2857	2	0.285714
C1	7	0	2020-09-01	1	0	0	0
C1	7	0	2020-09-01	1	0	0	0
C1	7	0	2020-09-01	1	0	0	0
C1	7	0	2020-09-01	1	0	0	0
C1	7	0	2020-09-01	1	0	0	0
C1	7	0	2020-09-01	1	0	0	0
C1	7	0	2020-09-01	1	0	0	0
C1	7	0	2020-09-01	1	0	0	0
C1	7	0	2020-09-01	1	0	0	0
C1	7	0	2020-09-01	1	0	0	0
C1	7	0	2020-09-01	1	0	0	0
C1	7	0	2020-09-01	1	0	0	0
C1	7	0	2020-09-01	1	0	0	0
C1	7	0	2020-09-01	1	0	0	0
C1	7	0	2020-09-01	1	0	0	0
C2	7	0	2020-09-01	1	0	0	0
C2	7	0	2020-09-01	1	0	0	0
C2	7	0	2020-09-01	1	0	0	0
C2	7	0	2020-09-01	1	0	0	0
C2	7	0	2020-09-01	1	0	0	0
C2	7	0	2020-09-01	1	0	0	0
C2	7	0	2020-09-01	1	0	0	0
C2	7	0	2020-09-01	1	0	0	0
C2	7	0	2020-09-01	1	0	0	0
C2	7	0	2020-09-01	1	0	0	0
C2	7	0	2020-09-01	1	0	0	0
C2	7	0	2020-09-01	1	0	0	0
C2	7	0	2020-09-01	1	0	0	0
C2	7	0	2020-09-01	1	0	0	0
C2	7	0	2020-09-01	1	0	0	0
C3	7	0	2020-09-01	1	0	0	0
C3	7	0	2020-09-01	1	0	0	0
C3	7	0	2020-09-01	1	0	0	0
C3	7	0	2020-09-01	1	0	0	0
C3	7	0	2020-09-01	1	0	0	0
C3	7	0	2020-09-01	1	0	0	0
C3	7	0	2020-09-01	1	0	0	0
C3	7	0	2020-09-01	1	0	0	0
C3	7	0	2020-09-01	1	0	0	0
C3	7	0	2020-09-01	1	0	0	0
C3	7	0	2020-09-01	1	0	0	0
C3	7	0	2020-09-01	1	0	0	0
C3	7	0	2020-09-01	1	0	0	0
C3	7	0	2020-09-01	1	0	0	0
C3	7	0	2020-09-01	1	0	0	0
MycoMillet15	7	0	2020-09-01	1	0	0	0
MycoMillet15	7	0	2020-09-01	1	0	0	0
MycoMillet15	7	0	2020-09-01	1	0	0	0
MycoMillet15	7	0	2020-09-01	1	0	0	0
MycoMillet15	7	0	2020-09-01	1	0	0	0
MycoMillet15	7	0	2020-09-01	1	0	0	0
MycoMillet15	7	0	2020-09-01	1	0	0	0
MycoMillet15	7	0	2020-09-01	1	0	0	0
MycoMillet15	7	0	2020-09-01	1	0	0	0
MycoMillet15	7	0	2020-09-01	1	0	0	0
MycoMillet15	7	0	2020-09-01	1	0	0	0
MycoMillet15	7	0	2020-09-01	1	0	0	0
MycoMillet15	7	0	2020-09-01	1	0	0	0
MycoMillet15	7	0	2020-09-01	1	0	0	0
MycoMillet15	7	0	2020-09-01	1	0	0	0
MycoMillet25	7	0	2020-09-01	1	0	0	0
MycoMillet25	7	0	2020-09-01	1	0	0	0
MycoMillet25	7	0	2020-09-01	1	0	0	0
MycoMillet25	7	0	2020-09-01	1	0	0	0
MycoMillet25	7	0	2020-09-01	1	0	0	0
MycoMillet25	7	0	2020-09-01	1	0	0	0
MycoMillet25	7	0	2020-09-01	1	0	0	0
MycoMillet25	7	0	2020-09-01	1	0	0	0
MycoMillet25	7	0	2020-09-01	1	0	0	0
MycoMillet25	7	0	2020-09-01	1	0	0	0
MycoMillet25	7	0	2020-09-01	1	0	0	0
MycoMillet25	7	0	2020-09-01	1	0	0	0
MycoMillet25	7	0	2020-09-01	1	0	0	0
MycoMillet25	7	0	2020-09-01	1	0	0	0
MycoMillet25	7	0	2020-09-01	1	0	0	0
B.bassiana	5	0	2020-09-10	2	0	2	0.285714
B.bassiana	7	1	2020-09-10	2	14.2857	0	0
B.bassiana	2	0	2020-09-10	2	0	5	0.714286
B.bassiana	5	1	2020-09-10	2	14.2857	2	0.285714
B.bassiana	5	0	2020-09-10	2	0	2	0.285714
B.bassiana	6	0	2020-09-10	2	0	1	0.142857
B.bassiana	5	0	2020-09-10	2	0	2	0.285714
B.bassiana	7	0	2020-09-10	2	0	0	0
B.bassiana	4	0	2020-09-10	2	0	3	0.428571
B.bassiana	5	0	2020-09-10	2	0	2	0.285714
B.bassiana	2	0	2020-09-10	2	0	5	0.714286
B.bassiana	6	0	2020-09-10	2	0	1	0.142857
B.bassiana	5	0	2020-09-10	2	0	2	0.285714
B.bassiana	5	0	2020-09-10	2	0	2	0.285714
B.bassiana	6	0	2020-09-10	2	0	1	0.142857
BotaniGard	6	0	2020-09-10	2	0	1	0.142857
BotaniGard	6	4	2020-09-10	2	57.1429	1	0.142857
BotaniGard	5	0	2020-09-10	2	0	2	0.285714
BotaniGard	6	0	2020-09-10	2	0	1	0.142857
BotaniGard	6	1	2020-09-10	2	14.2857	1	0.142857
BotaniGard	6	0	2020-09-10	2	0	1	0.142857
BotaniGard	6	2	2020-09-10	2	28.5714	1	0.142857
BotaniGard	6	0	2020-09-10	2	0	1	0.142857
BotaniGard	4	2	2020-09-10	2	28.5714	3	0.428571
BotaniGard	7	2	2020-09-10	2	28.5714	0	0
BotaniGard	6	0	2020-09-10	2	0	1	0.142857
BotaniGard	7	4	2020-09-10	2	57.1429	0	0
BotaniGard	6	1	2020-09-10	2	14.2857	1	0.142857
BotaniGard	5	0	2020-09-10	2	0	2	0.285714
BotaniGard	5	1	2020-09-10	2	14.2857	2	0.285714
C1	6	0	2020-09-10	2	0	1	0.142857
C1	5	0	2020-09-10	2	0	2	0.285714
C1	7	1	2020-09-10	2	14.2857	0	0
C1	7	0	2020-09-10	2	0	0	0
C1	6	2	2020-09-10	2	28.5714	1	0.142857
C1	6	2	2020-09-10	2	28.5714	1	0.142857
C1	7	3	2020-09-10	2	42.8571	0	0
C1	7	1	2020-09-10	2	14.2857	0	0
C1	7	1	2020-09-10	2	14.2857	0	0
C1	5	0	2020-09-10	2	0	2	0.285714
C1	7	1	2020-09-10	2	14.2857	0	0
C1	7	0	2020-09-10	2	0	0	0
C1	7	1	2020-09-10	2	14.2857	0	0
C1	7	2	2020-09-10	2	28.5714	0	0
C1	7	0	2020-09-10	2	0	0	0
C2	6	2	2020-09-10	2	28.5714	1	0.142857
C2	7	1	2020-09-10	2	14.2857	0	0
C2	7	2	2020-09-10	2	28.5714	0	0
C2	5	2	2020-09-10	2	28.5714	2	0.285714
C2	5	0	2020-09-10	2	0	2	0.285714
C2	7	1	2020-09-10	2	14.2857	0	0
C2	7	1	2020-09-10	2	14.2857	0	0
C2	6	2	2020-09-10	2	28.5714	1	0.142857
C2	7	2	2020-09-10	2	28.5714	0	0
C2	7	0	2020-09-10	2	0	0	0
C2	7	2	2020-09-10	2	28.5714	0	0
C2	5	3	2020-09-10	2	42.8571	2	0.285714
C2	6	1	2020-09-10	2	14.2857	1	0.142857
C2	7	3	2020-09-10	2	42.8571	0	0
C2	5	0	2020-09-10	2	0	2	0.285714
C3	7	1	2020-09-10	2	14.2857	0	0
C3	6	1	2020-09-10	2	14.2857	1	0.142857
C3	6	3	2020-09-10	2	42.8571	1	0.142857
C3	6	2	2020-09-10	2	28.5714	1	0.142857
C3	7	2	2020-09-10	2	28.5714	0	0
C3	7	1	2020-09-10	2	14.2857	0	0
C3	5	2	2020-09-10	2	28.5714	2	0.285714
C3	6	2	2020-09-10	2	28.5714	1	0.142857
C3	7	1	2020-09-10	2	14.2857	0	0
C3	6	1	2020-09-10	2	14.2857	1	0.142857
C3	7	1	2020-09-10	2	14.2857	0	0
C3	7	4	2020-09-10	2	57.1429	0	0
C3	7	1	2020-09-10	2	14.2857	0	0
C3	7	3	2020-09-10	2	42.8571	0	0
C3	5	0	2020-09-10	2	0	2	0.285714
MycoMillet15	6	1	2020-09-10	2	14.2857	1	0.142857
MycoMillet15	7	0	2020-09-10	2	0	0	0
MycoMillet15	7	1	2020-09-10	2	14.2857	0	0
MycoMillet15	5	0	2020-09-10	2	0	2	0.285714
MycoMillet15	7	1	2020-09-10	2	14.2857	0	0
MycoMillet15	7	2	2020-09-10	2	28.5714	0	0
MycoMillet15	4	0	2020-09-10	2	0	3	0.428571
MycoMillet15	6	0	2020-09-10	2	0	1	0.142857
MycoMillet15	7	1	2020-09-10	2	14.2857	0	0
MycoMillet15	7	2	2020-09-10	2	28.5714	0	0
MycoMillet15	7	1	2020-09-10	2	14.2857	0	0
MycoMillet15	6	1	2020-09-10	2	14.2857	1	0.142857
MycoMillet15	7	0	2020-09-10	2	0	0	0
MycoMillet15	5	0	2020-09-10	2	0	2	0.285714
MycoMillet15	6	0	2020-09-10	2	0	1	0.142857
MycoMillet25	7	0	2020-09-10	2	0	0	0
MycoMillet25	6	1	2020-09-10	2	14.2857	1	0.142857
MycoMillet25	2	1	2020-09-10	2	14.2857	5	0.714286
MycoMillet25	6	0	2020-09-10	2	0	1	0.142857
MycoMillet25	5	0	2020-09-10	2	0	2	0.285714
MycoMillet25	3	0	2020-09-10	2	0	4	0.571429
MycoMillet25	6	1	2020-09-10	2	14.2857	1	0.142857
MycoMillet25	5	0	2020-09-10	2	0	2	0.285714
MycoMillet25	6	3	2020-09-10	2	42.8571	1	0.142857
MycoMillet25	3	0	2020-09-10	2	0	4	0.571429
MycoMillet25	5	1	2020-09-10	2	14.2857	2	0.285714
MycoMillet25	6	0	2020-09-10	2	0	1	0.142857
MycoMillet25	4	0	2020-09-10	2	0	3	0.428571
MycoMillet25	7	0	2020-09-10	2	0	0	0
MycoMillet25	6	0	2020-09-10	2	0	1	0.142857
B.bassiana	1	0	2020-09-13	3	0	6	0.857143
B.bassiana	5	1	2020-09-13	3	14.2857	2	0.285714
B.bassiana	0	0	2020-09-13	3	0	7	1
B.bassiana	3	1	2020-09-13	3	14.2857	4	0.571429
B.bassiana	4	0	2020-09-13	3	0	3	0.428571
B.bassiana	4	0	2020-09-13	3	0	3	0.428571
B.bassiana	5	1	2020-09-13	3	14.2857	2	0.285714
B.bassiana	5	1	2020-09-13	3	14.2857	2	0.285714
B.bassiana	3	0	2020-09-13	3	0	4	0.571429
B.bassiana	5	0	2020-09-13	3	0	2	0.285714
B.bassiana	1	0	2020-09-13	3	0	6	0.857143
B.bassiana	4	0	2020-09-13	3	0	3	0.428571
B.bassiana	4	0	2020-09-13	3	0	3	0.428571
B.bassiana	5	0	2020-09-13	3	0	2	0.285714
B.bassiana	5	0	2020-09-13	3	0	2	0.285714
BotaniGard	5	3	2020-09-13	3	42.8571	2	0.285714
BotaniGard	6	1	2020-09-13	3	14.2857	1	0.142857
BotaniGard	5	0	2020-09-13	3	0	2	0.285714
BotaniGard	6	3	2020-09-13	3	42.8571	1	0.142857
BotaniGard	6	1	2020-09-13	3	14.2857	1	0.142857
BotaniGard	6	0	2020-09-13	3	0	1	0.142857
BotaniGard	6	3	2020-09-13	3	42.8571	1	0.142857
BotaniGard	6	0	2020-09-13	3	0	1	0.142857
BotaniGard	4	2	2020-09-13	3	28.5714	3	0.428571
BotaniGard	6	3	2020-09-13	3	42.8571	1	0.142857
BotaniGard	5	3	2020-09-13	3	42.8571	2	0.285714
BotaniGard	7	4	2020-09-13	3	57.1429	0	0
BotaniGard	6	2	2020-09-13	3	28.5714	1	0.142857
BotaniGard	5	0	2020-09-13	3	0	2	0.285714
BotaniGard	5	3	2020-09-13	3	42.8571	2	0.285714
C1	3	1	2020-09-13	3	14.2857	4	0.571429
C1	5	0	2020-09-13	3	0	2	0.285714
C1	7	3	2020-09-13	3	42.8571	0	0
C1	7	0	2020-09-13	3	0	0	0
C1	5	3	2020-09-13	3	42.8571	2	0.285714
C1	6	2	2020-09-13	3	28.5714	1	0.142857
C1	7	4	2020-09-13	3	57.1429	0	0
C1	7	2	2020-09-13	3	28.5714	0	0
C1	7	2	2020-09-13	3	28.5714	0	0
C1	5	0	2020-09-13	3	0	2	0.285714
C1	7	1	2020-09-13	3	14.2857	0	0
C1	7	0	2020-09-13	3	0	0	0
C1	7	1	2020-09-13	3	14.2857	0	0
C1	7	3	2020-09-13	3	42.8571	0	0
C1	7	1	2020-09-13	3	14.2857	0	0
C2	6	2	2020-09-13	3	28.5714	1	0.142857
C2	7	2	2020-09-13	3	28.5714	0	0
C2	7	4	2020-09-13	3	57.1429	0	0
C2	5	3	2020-09-13	3	42.8571	2	0.285714
C2	5	0	2020-09-13	3	0	2	0.285714
C2	7	2	2020-09-13	3	28.5714	0	0
C2	7	4	2020-09-13	3	57.1429	0	0
C2	6	2	2020-09-13	3	28.5714	1	0.142857
C2	7	2	2020-09-13	3	28.5714	0	0
C2	7	1	2020-09-13	3	14.2857	0	0
C2	7	3	2020-09-13	3	42.8571	0	0
C2	5	3	2020-09-13	3	42.8571	2	0.285714
C2	6	2	2020-09-13	3	28.5714	1	0.142857
C2	7	4	2020-09-13	3	57.1429	0	0
C2	5	1	2020-09-13	3	14.2857	2	0.285714
C3	6	2	2020-09-13	3	28.5714	1	0.142857
C3	6	1	2020-09-13	3	14.2857	1	0.142857
C3	6	3	2020-09-13	3	42.8571	1	0.142857
C3	6	2	2020-09-13	3	28.5714	1	0.142857
C3	6	2	2020-09-13	3	28.5714	1	0.142857
C3	7	1	2020-09-13	3	14.2857	0	0
C3	5	2	2020-09-13	3	28.5714	2	0.285714
C3	6	3	2020-09-13	3	42.8571	1	0.142857
C3	7	3	2020-09-13	3	42.8571	0	0
C3	6	2	2020-09-13	3	28.5714	1	0.142857
C3	7	1	2020-09-13	3	14.2857	0	0
C3	7	4	2020-09-13	3	57.1429	0	0
C3	7	2	2020-09-13	3	28.5714	0	0
C3	7	4	2020-09-13	3	57.1429	0	0
C3	4	0	2020-09-13	3	0	3	0.428571
MycoMillet15	6	2	2020-09-13	3	28.5714	1	0.142857
MycoMillet15	7	1	2020-09-13	3	14.2857	0	0
MycoMillet15	7	2	2020-09-13	3	28.5714	0	0
MycoMillet15	5	1	2020-09-13	3	14.2857	2	0.285714
MycoMillet15	7	2	2020-09-13	3	28.5714	0	0
MycoMillet15	6	4	2020-09-13	3	57.1429	1	0.142857
MycoMillet15	3	0	2020-09-13	3	0	4	0.571429
MycoMillet15	5	0	2020-09-13	3	0	2	0.285714
MycoMillet15	5	2	2020-09-13	3	28.5714	2	0.285714
MycoMillet15	7	3	2020-09-13	3	42.8571	0	0
MycoMillet15	7	0	2020-09-13	3	0	0	0
MycoMillet15	6	1	2020-09-13	3	14.2857	1	0.142857
MycoMillet15	6	1	2020-09-13	3	14.2857	1	0.142857
MycoMillet15	5	0	2020-09-13	3	0	2	0.285714
MycoMillet15	5	0	2020-09-13	3	0	2	0.285714
MycoMillet25	6	1	2020-09-13	3	14.2857	1	0.142857
MycoMillet25	5	1	2020-09-13	3	14.2857	2	0.285714
MycoMillet25	1	0	2020-09-13	3	0	6	0.857143
MycoMillet25	3	0	2020-09-13	3	0	4	0.571429
MycoMillet25	3	0	2020-09-13	3	0	4	0.571429
MycoMillet25	2	0	2020-09-13	3	0	5	0.714286
MycoMillet25	6	3	2020-09-13	3	42.8571	1	0.142857
MycoMillet25	5	2	2020-09-13	3	28.5714	2	0.285714
MycoMillet25	6	4	2020-09-13	3	57.1429	1	0.142857
MycoMillet25	2	0	2020-09-13	3	0	5	0.714286
MycoMillet25	5	1	2020-09-13	3	14.2857	2	0.285714
MycoMillet25	6	3	2020-09-13	3	42.8571	1	0.142857
MycoMillet25	2	0	2020-09-13	3	0	5	0.714286
MycoMillet25	6	0	2020-09-13	3	0	1	0.142857
MycoMillet25	6	1	2020-09-13	3	14.2857	1	0.142857
B.bassiana	1	0	2020-09-17	4	0	6	0.857143
B.bassiana	5	1	2020-09-17	4	14.2857	2	0.285714
B.bassiana	0	0	2020-09-17	4	0	7	1
B.bassiana	3	1	2020-09-17	4	14.2857	4	0.571429
B.bassiana	4	0	2020-09-17	4	0	3	0.428571
B.bassiana	4	0	2020-09-17	4	0	3	0.428571
B.bassiana	5	1	2020-09-17	4	14.2857	2	0.285714
B.bassiana	5	1	2020-09-17	4	14.2857	2	0.285714
B.bassiana	3	0	2020-09-17	4	0	4	0.571429
B.bassiana	5	0	2020-09-17	4	0	2	0.285714
B.bassiana	1	0	2020-09-17	4	0	6	0.857143
B.bassiana	4	0	2020-09-17	4	0	3	0.428571
B.bassiana	4	0	2020-09-17	4	0	3	0.428571
B.bassiana	5	0	2020-09-17	4	0	2	0.285714
B.bassiana	5	0	2020-09-17	4	0	2	0.285714
BotaniGard	5	3	2020-09-17	4	42.8571	2	0.285714
BotaniGard	6	1	2020-09-17	4	14.2857	1	0.142857
BotaniGard	5	0	2020-09-17	4	0	2	0.285714
BotaniGard	6	3	2020-09-17	4	42.8571	1	0.142857
BotaniGard	6	1	2020-09-17	4	14.2857	1	0.142857
BotaniGard	6	0	2020-09-17	4	0	1	0.142857
BotaniGard	6	3	2020-09-17	4	42.8571	1	0.142857
BotaniGard	6	0	2020-09-17	4	0	1	0.142857
BotaniGard	4	2	2020-09-17	4	28.5714	3	0.428571
BotaniGard	6	3	2020-09-17	4	42.8571	1	0.142857
BotaniGard	5	3	2020-09-17	4	42.8571	2	0.285714
BotaniGard	7	4	2020-09-17	4	57.1429	0	0
BotaniGard	6	2	2020-09-17	4	28.5714	1	0.142857
BotaniGard	5	0	2020-09-17	4	0	2	0.285714
BotaniGard	5	3	2020-09-17	4	42.8571	2	0.285714
C1	3	1	2020-09-17	4	14.2857	4	0.571429
C1	5	0	2020-09-17	4	0	2	0.285714
C1	7	3	2020-09-17	4	42.8571	0	0
C1	7	0	2020-09-17	4	0	0	0
C1	5	3	2020-09-17	4	42.8571	2	0.285714
C1	6	3	2020-09-17	4	42.8571	1	0.142857
C1	7	4	2020-09-17	4	57.1429	0	0
C1	7	2	2020-09-17	4	28.5714	0	0
C1	7	2	2020-09-17	4	28.5714	0	0
C1	5	0	2020-09-17	4	0	2	0.285714
C1	7	1	2020-09-17	4	14.2857	0	0
C1	7	0	2020-09-17	4	0	0	0
C1	7	1	2020-09-17	4	14.2857	0	0
C1	6	3	2020-09-17	4	42.8571	1	0.142857
C1	7	1	2020-09-17	4	14.2857	0	0
C2	6	2	2020-09-17	4	28.5714	1	0.142857
C2	7	2	2020-09-17	4	28.5714	0	0
C2	7	4	2020-09-17	4	57.1429	0	0
C2	5	3	2020-09-17	4	42.8571	2	0.285714
C2	5	0	2020-09-17	4	0	2	0.285714
C2	7	2	2020-09-17	4	28.5714	0	0
C2	7	4	2020-09-17	4	57.1429	0	0
C2	6	2	2020-09-17	4	28.5714	1	0.142857
C2	7	2	2020-09-17	4	28.5714	0	0
C2	7	1	2020-09-17	4	14.2857	0	0
C2	7	3	2020-09-17	4	42.8571	0	0
C2	5	3	2020-09-17	4	42.8571	2	0.285714
C2	6	2	2020-09-17	4	28.5714	1	0.142857
C2	7	4	2020-09-17	4	57.1429	0	0
C2	5	1	2020-09-17	4	14.2857	2	0.285714
C3	6	2	2020-09-17	4	28.5714	1	0.142857
C3	6	1	2020-09-17	4	14.2857	1	0.142857
C3	6	3	2020-09-17	4	42.8571	1	0.142857
C3	6	2	2020-09-17	4	28.5714	1	0.142857
C3	6	3	2020-09-17	4	42.8571	1	0.142857
C3	7	1	2020-09-17	4	14.2857	0	0
C3	5	2	2020-09-17	4	28.5714	2	0.285714
C3	6	3	2020-09-17	4	42.8571	1	0.142857
C3	7	3	2020-09-17	4	42.8571	0	0
C3	6	2	2020-09-17	4	28.5714	1	0.142857
C3	7	1	2020-09-17	4	14.2857	0	0
C3	7	4	2020-09-17	4	57.1429	0	0
C3	7	2	2020-09-17	4	28.5714	0	0
C3	7	4	2020-09-17	4	57.1429	0	0
C3	4	0	2020-09-17	4	0	3	0.428571
MycoMillet15	6	2	2020-09-17	4	28.5714	1	0.142857
MycoMillet15	7	1	2020-09-17	4	14.2857	0	0
MycoMillet15	7	2	2020-09-17	4	28.5714	0	0
MycoMillet15	5	1	2020-09-17	4	14.2857	2	0.285714
MycoMillet15	7	2	2020-09-17	4	28.5714	0	0
MycoMillet15	6	4	2020-09-17	4	57.1429	1	0.142857
MycoMillet15	3	0	2020-09-17	4	0	4	0.571429
MycoMillet15	5	0	2020-09-17	4	0	2	0.285714
MycoMillet15	5	2	2020-09-17	4	28.5714	2	0.285714
MycoMillet15	7	3	2020-09-17	4	42.8571	0	0
MycoMillet15	7	0	2020-09-17	4	0	0	0
MycoMillet15	6	1	2020-09-17	4	14.2857	1	0.142857
MycoMillet15	6	1	2020-09-17	4	14.2857	1	0.142857
MycoMillet15	5	0	2020-09-17	4	0	2	0.285714
MycoMillet15	5	0	2020-09-17	4	0	2	0.285714
MycoMillet25	6	1	2020-09-17	4	14.2857	1	0.142857
MycoMillet25	5	1	2020-09-17	4	14.2857	2	0.285714
MycoMillet25	1	0	2020-09-17	4	0	6	0.857143
MycoMillet25	3	0	2020-09-17	4	0	4	0.571429
MycoMillet25	3	0	2020-09-17	4	0	4	0.571429
MycoMillet25	2	0	2020-09-17	4	0	5	0.714286
MycoMillet25	6	3	2020-09-17	4	42.8571	1	0.142857
MycoMillet25	5	2	2020-09-17	4	28.5714	2	0.285714
MycoMillet25	6	4	2020-09-17	4	57.1429	1	0.142857
MycoMillet25	2	0	2020-09-17	4	0	5	0.714286
MycoMillet25	5	1	2020-09-17	4	14.2857	2	0.285714
MycoMillet25	6	3	2020-09-17	4	42.8571	1	0.142857
MycoMillet25	2	0	2020-09-17	4	0	5	0.714286
MycoMillet25	6	0	2020-09-17	4	0	1	0.142857
MycoMillet25	6	1	2020-09-17	4	14.2857	1	0.142857
B.bassiana	0	0	2020-09-19	5	0	7	1
B.bassiana	0	0	2020-09-19	5	0	7	1
B.bassiana	0	0	2020-09-19	5	0	7	1
B.bassiana	3	1	2020-09-19	5	14.2857	4	0.571429
B.bassiana	3	0	2020-09-19	5	0	4	0.571429
B.bassiana	1	0	2020-09-19	5	0	6	0.857143
B.bassiana	4	1	2020-09-19	5	14.2857	3	0.428571
B.bassiana	3	0	2020-09-19	5	0	4	0.571429
B.bassiana	3	0	2020-09-19	5	0	4	0.571429
B.bassiana	4	1	2020-09-19	5	14.2857	3	0.428571
B.bassiana	1	0	2020-09-19	5	0	6	0.857143
B.bassiana	4	0	2020-09-19	5	0	3	0.428571
B.bassiana	0	0	2020-09-19	5	0	7	1
B.bassiana	2	0	2020-09-19	5	0	5	0.714286
B.bassiana	1	0	2020-09-19	5	0	6	0.857143
BotaniGard	3	2	2020-09-19	5	28.5714	4	0.571429
BotaniGard	6	5	2020-09-19	5	71.4286	1	0.142857
BotaniGard	5	3	2020-09-19	5	42.8571	2	0.285714
BotaniGard	5	3	2020-09-19	5	42.8571	2	0.285714
BotaniGard	3	2	2020-09-19	5	28.5714	4	0.571429
BotaniGard	5	1	2020-09-19	5	14.2857	2	0.285714
BotaniGard	5	4	2020-09-19	5	57.1429	2	0.285714
BotaniGard	5	0	2020-09-19	5	0	2	0.285714
BotaniGard	4	2	2020-09-19	5	28.5714	3	0.428571
BotaniGard	6	3	2020-09-19	5	42.8571	1	0.142857
BotaniGard	5	3	2020-09-19	5	42.8571	2	0.285714
BotaniGard	7	4	2020-09-19	5	57.1429	0	0
BotaniGard	6	3	2020-09-19	5	42.8571	1	0.142857
BotaniGard	4	1	2020-09-19	5	14.2857	3	0.428571
BotaniGard	5	3	2020-09-19	5	42.8571	2	0.285714
C1	2	1	2020-09-19	5	14.2857	5	0.714286
C1	4	1	2020-09-19	5	14.2857	3	0.428571
C1	5	2	2020-09-19	5	28.5714	2	0.285714
C1	7	0	2020-09-19	5	0	0	0
C1	5	4	2020-09-19	5	57.1429	2	0.285714
C1	6	2	2020-09-19	5	28.5714	1	0.142857
C1	6	4	2020-09-19	5	57.1429	1	0.142857
C1	6	2	2020-09-19	5	28.5714	1	0.142857
C1	7	2	2020-09-19	5	28.5714	0	0
C1	5	0	2020-09-19	5	0	2	0.285714
C1	6	3	2020-09-19	5	42.8571	1	0.142857
C1	6	0	2020-09-19	5	0	1	0.142857
C1	6	2	2020-09-19	5	28.5714	1	0.142857
C1	6	3	2020-09-19	5	42.8571	1	0.142857
C1	6	1	2020-09-19	5	14.2857	1	0.142857
C2	5	5	2020-09-19	5	71.4286	2	0.285714
C2	6	3	2020-09-19	5	42.8571	1	0.142857
C2	7	4	2020-09-19	5	57.1429	0	0
C2	5	3	2020-09-19	5	42.8571	2	0.285714
C2	5	0	2020-09-19	5	0	2	0.285714
C2	6	4	2020-09-19	5	57.1429	1	0.142857
C2	7	4	2020-09-19	5	57.1429	0	0
C2	5	3	2020-09-19	5	42.8571	2	0.285714
C2	7	2	2020-09-19	5	28.5714	0	0
C2	7	1	2020-09-19	5	14.2857	0	0
C2	6	4	2020-09-19	5	57.1429	1	0.142857
C2	5	3	2020-09-19	5	42.8571	2	0.285714
C2	6	3	2020-09-19	5	42.8571	1	0.142857
C2	7	5	2020-09-19	5	71.4286	0	0
C2	5	3	2020-09-19	5	42.8571	2	0.285714
C3	6	3	2020-09-19	5	42.8571	1	0.142857
C3	6	4	2020-09-19	5	57.1429	1	0.142857
C3	6	4	2020-09-19	5	57.1429	1	0.142857
C3	6	2	2020-09-19	5	28.5714	1	0.142857
C3	6	3	2020-09-19	5	42.8571	1	0.142857
C3	7	4	2020-09-19	5	57.1429	0	0
C3	5	3	2020-09-19	5	42.8571	2	0.285714
C3	6	4	2020-09-19	5	57.1429	1	0.142857
C3	7	4	2020-09-19	5	57.1429	0	0
C3	6	4	2020-09-19	5	57.1429	1	0.142857
C3	7	3	2020-09-19	5	42.8571	0	0
C3	7	6	2020-09-19	5	85.7143	0	0
C3	7	4	2020-09-19	5	57.1429	0	0
C3	6	4	2020-09-19	5	57.1429	1	0.142857
C3	4	0	2020-09-19	5	0	3	0.428571
MycoMillet15	5	2	2020-09-19	5	28.5714	2	0.285714
MycoMillet15	7	2	2020-09-19	5	28.5714	0	0
MycoMillet15	6	3	2020-09-19	5	42.8571	1	0.142857
MycoMillet15	4	1	2020-09-19	5	14.2857	3	0.428571
MycoMillet15	7	3	2020-09-19	5	42.8571	0	0
MycoMillet15	4	3	2020-09-19	5	42.8571	3	0.428571
MycoMillet15	3	0	2020-09-19	5	0	4	0.571429
MycoMillet15	5	0	2020-09-19	5	0	2	0.285714
MycoMillet15	5	2	2020-09-19	5	28.5714	2	0.285714
MycoMillet15	7	4	2020-09-19	5	57.1429	0	0
MycoMillet15	6	1	2020-09-19	5	14.2857	1	0.142857
MycoMillet15	4	1	2020-09-19	5	14.2857	3	0.428571
MycoMillet15	5	1	2020-09-19	5	14.2857	2	0.285714
MycoMillet15	5	0	2020-09-19	5	0	2	0.285714
MycoMillet15	5	0	2020-09-19	5	0	2	0.285714
MycoMillet25	3	1	2020-09-19	5	14.2857	4	0.571429
MycoMillet25	5	3	2020-09-19	5	42.8571	2	0.285714
MycoMillet25	1	1	2020-09-19	5	14.2857	6	0.857143
MycoMillet25	2	0	2020-09-19	5	0	5	0.714286
MycoMillet25	3	0	2020-09-19	5	0	4	0.571429
MycoMillet25	1	0	2020-09-19	5	0	6	0.857143
MycoMillet25	6	4	2020-09-19	5	57.1429	1	0.142857
MycoMillet25	5	2	2020-09-19	5	28.5714	2	0.285714
MycoMillet25	6	5	2020-09-19	5	71.4286	1	0.142857
MycoMillet25	0	0	2020-09-19	5	0	7	1
MycoMillet25	4	1	2020-09-19	5	14.2857	3	0.428571
MycoMillet25	6	6	2020-09-19	5	85.7143	1	0.142857
MycoMillet25	0	0	2020-09-19	5	0	7	1
MycoMillet25	5	1	2020-09-19	5	14.2857	2	0.285714
MycoMillet25	4	1	2020-09-19	5	14.2857	3	0.428571
B.bassiana	0	0	2020-09-24	6	0	7	1
B.bassiana	0	0	2020-09-24	6	0	7	1
B.bassiana	0	0	2020-09-24	6	0	7	1
B.bassiana	2	1	2020-09-24	6	14.2857	5	0.714286
B.bassiana	2	0	2020-09-24	6	0	5	0.714286
B.bassiana	0	0	2020-09-24	6	0	7	1
B.bassiana	3	1	2020-09-24	6	14.2857	4	0.571429
B.bassiana	0	0	2020-09-24	6	0	7	1
B.bassiana	0	0	2020-09-24	6	0	7	1
B.bassiana	0	0	2020-09-24	6	0	7	1
B.bassiana	1	0	2020-09-24	6	0	6	0.857143
B.bassiana	4	1	2020-09-24	6	14.2857	3	0.428571
B.bassiana	0	0	2020-09-24	6	0	7	1
B.bassiana	1	1	2020-09-24	6	14.2857	6	0.857143
B.bassiana	0	0	2020-09-24	6	0	7	1
BotaniGard	3	3	2020-09-24	6	42.8571	4	0.571429
BotaniGard	6	6	2020-09-24	6	85.7143	1	0.142857
BotaniGard	5	3	2020-09-24	6	42.8571	2	0.285714
BotaniGard	0	0	2020-09-24	6	0	7	1
BotaniGard	1	1	2020-09-24	6	14.2857	6	0.857143
BotaniGard	0	0	2020-09-24	6	0	7	1
BotaniGard	5	4	2020-09-24	6	57.1429	2	0.285714
BotaniGard	5	1	2020-09-24	6	14.2857	2	0.285714
BotaniGard	2	2	2020-09-24	6	28.5714	5	0.714286
BotaniGard	6	4	2020-09-24	6	57.1429	1	0.142857
BotaniGard	5	3	2020-09-24	6	42.8571	2	0.285714
BotaniGard	7	4	2020-09-24	6	57.1429	0	0
BotaniGard	4	2	2020-09-24	6	28.5714	3	0.428571
BotaniGard	4	1	2020-09-24	6	14.2857	3	0.428571
BotaniGard	4	1	2020-09-24	6	14.2857	3	0.428571
C1	0	0	2020-09-24	6	0	7	1
C1	2	1	2020-09-24	6	14.2857	5	0.714286
C1	4	3	2020-09-24	6	42.8571	3	0.428571
C1	4	1	2020-09-24	6	14.2857	3	0.428571
C1	5	4	2020-09-24	6	57.1429	2	0.285714
C1	4	4	2020-09-24	6	57.1429	3	0.428571
C1	2	2	2020-09-24	6	28.5714	5	0.714286
C1	2	1	2020-09-24	6	14.2857	5	0.714286
C1	6	3	2020-09-24	6	42.8571	1	0.142857
C1	1	0	2020-09-24	6	0	6	0.857143
C1	6	3	2020-09-24	6	42.8571	1	0.142857
C1	5	1	2020-09-24	6	14.2857	2	0.285714
C1	4	1	2020-09-24	6	14.2857	3	0.428571
C1	1	1	2020-09-24	6	14.2857	6	0.857143
C1	6	2	2020-09-24	6	28.5714	1	0.142857
C2	5	5	2020-09-24	6	71.4286	2	0.285714
C2	6	4	2020-09-24	6	57.1429	1	0.142857
C2	7	5	2020-09-24	6	71.4286	0	0
C2	5	5	2020-09-24	6	71.4286	2	0.285714
C2	5	3	2020-09-24	6	42.8571	2	0.285714
C2	6	5	2020-09-24	6	71.4286	1	0.142857
C2	6	5	2020-09-24	6	71.4286	1	0.142857
C2	5	3	2020-09-24	6	42.8571	2	0.285714
C2	7	6	2020-09-24	6	85.7143	0	0
C2	7	5	2020-09-24	6	71.4286	0	0
C2	6	5	2020-09-24	6	71.4286	1	0.142857
C2	5	4	2020-09-24	6	57.1429	2	0.285714
C2	6	5	2020-09-24	6	71.4286	1	0.142857
C2	7	6	2020-09-24	6	85.7143	0	0
C2	5	5	2020-09-24	6	71.4286	2	0.285714
C3	6	4	2020-09-24	6	57.1429	1	0.142857
C3	6	5	2020-09-24	6	71.4286	1	0.142857
C3	6	6	2020-09-24	6	85.7143	1	0.142857
C3	6	4	2020-09-24	6	57.1429	1	0.142857
C3	6	6	2020-09-24	6	85.7143	1	0.142857
C3	7	4	2020-09-24	6	57.1429	0	0
C3	5	4	2020-09-24	6	57.1429	2	0.285714
C3	6	5	2020-09-24	6	71.4286	1	0.142857
C3	7	6	2020-09-24	6	85.7143	0	0
C3	5	4	2020-09-24	6	57.1429	2	0.285714
C3	7	7	2020-09-24	6	100	0	0
C3	7	7	2020-09-24	6	100	0	0
C3	7	4	2020-09-24	6	57.1429	0	0
C3	6	6	2020-09-24	6	85.7143	1	0.142857
C3	4	1	2020-09-24	6	14.2857	3	0.428571
MycoMillet15	5	4	2020-09-24	6	57.1429	2	0.285714
MycoMillet15	3	1	2020-09-24	6	14.2857	4	0.571429
MycoMillet15	6	4	2020-09-24	6	57.1429	1	0.142857
MycoMillet15	4	1	2020-09-24	6	14.2857	3	0.428571
MycoMillet15	7	4	2020-09-24	6	57.1429	0	0
MycoMillet15	4	4	2020-09-24	6	57.1429	3	0.428571
MycoMillet15	3	0	2020-09-24	6	0	4	0.571429
MycoMillet15	5	0	2020-09-24	6	0	2	0.285714
MycoMillet15	3	2	2020-09-24	6	28.5714	4	0.571429
MycoMillet15	7	6	2020-09-24	6	85.7143	0	0
MycoMillet15	6	1	2020-09-24	6	14.2857	1	0.142857
MycoMillet15	4	1	2020-09-24	6	14.2857	3	0.428571
MycoMillet15	4	0	2020-09-24	6	0	3	0.428571
MycoMillet15	4	0	2020-09-24	6	0	3	0.428571
MycoMillet15	4	0	2020-09-24	6	0	3	0.428571
MycoMillet25	0	0	2020-09-24	6	0	7	1
MycoMillet25	4	3	2020-09-24	6	42.8571	3	0.428571
MycoMillet25	1	1	2020-09-24	6	14.2857	6	0.857143
MycoMillet25	0	0	2020-09-24	6	0	7	1
MycoMillet25	3	0	2020-09-24	6	0	4	0.571429
MycoMillet25	0	0	2020-09-24	6	0	7	1
MycoMillet25	6	5	2020-09-24	6	71.4286	1	0.142857
MycoMillet25	4	3	2020-09-24	6	42.8571	3	0.428571
MycoMillet25	6	5	2020-09-24	6	71.4286	1	0.142857
MycoMillet25	0	0	2020-09-24	6	0	7	1
MycoMillet25	4	2	2020-09-24	6	28.5714	3	0.428571
MycoMillet25	6	6	2020-09-24	6	85.7143	1	0.142857
MycoMillet25	0	0	2020-09-24	6	0	7	1
MycoMillet25	1	0	2020-09-24	6	0	6	0.857143
MycoMillet25	2	2	2020-09-24	6	28.5714	5	0.714286
B.bassiana	0	0	2020-09-27	7	0	7	1
B.bassiana	0	0	2020-09-27	7	0	7	1
B.bassiana	0	0	2020-09-27	7	0	7	1
B.bassiana	2	1	2020-09-27	7	14.2857	5	0.714286
B.bassiana	0	0	2020-09-27	7	0	7	1
B.bassiana	0	0	2020-09-27	7	0	7	1
B.bassiana	1	1	2020-09-27	7	14.2857	6	0.857143
B.bassiana	0	0	2020-09-27	7	0	7	1
B.bassiana	0	0	2020-09-27	7	0	7	1
B.bassiana	0	0	2020-09-27	7	0	7	1
B.bassiana	0	0	2020-09-27	7	0	7	1
B.bassiana	3	0	2020-09-27	7	0	4	0.571429
B.bassiana	0	0	2020-09-27	7	0	7	1
B.bassiana	0	0	2020-09-27	7	0	7	1
B.bassiana	0	0	2020-09-27	7	0	7	1
BotaniGard	3	3	2020-09-27	7	42.8571	4	0.571429
BotaniGard	6	6	2020-09-27	7	85.7143	1	0.142857
BotaniGard	5	3	2020-09-27	7	42.8571	2	0.285714
BotaniGard	0	0	2020-09-27	7	0	7	1
BotaniGard	1	1	2020-09-27	7	14.2857	6	0.857143
BotaniGard	0	0	2020-09-27	7	0	7	1
BotaniGard	5	4	2020-09-27	7	57.1429	2	0.285714
BotaniGard	5	1	2020-09-27	7	14.2857	2	0.285714
BotaniGard	0	0	2020-09-27	7	0	7	1
BotaniGard	4	3	2020-09-27	7	42.8571	3	0.428571
BotaniGard	4	4	2020-09-27	7	57.1429	3	0.428571
BotaniGard	7	4	2020-09-27	7	57.1429	0	0
BotaniGard	4	2	2020-09-27	7	28.5714	3	0.428571
BotaniGard	2	1	2020-09-27	7	14.2857	5	0.714286
BotaniGard	1	0	2020-09-27	7	0	6	0.857143
C1	0	0	2020-09-27	7	0	7	1
C1	2	1	2020-09-27	7	14.2857	5	0.714286
C1	4	3	2020-09-27	7	42.8571	3	0.428571
C1	4	1	2020-09-27	7	14.2857	3	0.428571
C1	5	5	2020-09-27	7	71.4286	2	0.285714
C1	1	1	2020-09-27	7	14.2857	6	0.857143
C1	1	1	2020-09-27	7	14.2857	6	0.857143
C1	2	1	2020-09-27	7	14.2857	5	0.714286
C1	4	3	2020-09-27	7	42.8571	3	0.428571
C1	1	0	2020-09-27	7	0	6	0.857143
C1	5	3	2020-09-27	7	42.8571	2	0.285714
C1	4	1	2020-09-27	7	14.2857	3	0.428571
C1	2	1	2020-09-27	7	14.2857	5	0.714286
C1	1	1	2020-09-27	7	14.2857	6	0.857143
C1	5	2	2020-09-27	7	28.5714	2	0.285714
C2	5	5	2020-09-27	7	71.4286	2	0.285714
C2	6	5	2020-09-27	7	71.4286	1	0.142857
C2	7	5	2020-09-27	7	71.4286	0	0
C2	5	4	2020-09-27	7	57.1429	2	0.285714
C2	4	3	2020-09-27	7	42.8571	3	0.428571
C2	6	5	2020-09-27	7	71.4286	1	0.142857
C2	7	6	2020-09-27	7	85.7143	0	0
C2	5	3	2020-09-27	7	42.8571	2	0.285714
C2	7	6	2020-09-27	7	85.7143	0	0
C2	7	5	2020-09-27	7	71.4286	0	0
C2	6	5	2020-09-27	7	71.4286	1	0.142857
C2	5	5	2020-09-27	7	71.4286	2	0.285714
C2	6	5	2020-09-27	7	71.4286	1	0.142857
C2	7	6	2020-09-27	7	85.7143	0	0
C2	5	5	2020-09-27	7	71.4286	2	0.285714
C3	6	4	2020-09-27	7	57.1429	1	0.142857
C3	6	6	2020-09-27	7	85.7143	1	0.142857
C3	6	6	2020-09-27	7	85.7143	1	0.142857
C3	5	4	2020-09-27	7	57.1429	2	0.285714
C3	6	6	2020-09-27	7	85.7143	1	0.142857
C3	7	5	2020-09-27	7	71.4286	0	0
C3	5	4	2020-09-27	7	57.1429	2	0.285714
C3	6	5	2020-09-27	7	71.4286	1	0.142857
C3	7	6	2020-09-27	7	85.7143	0	0
C3	5	4	2020-09-27	7	57.1429	2	0.285714
C3	7	6	2020-09-27	7	85.7143	0	0
C3	6	6	2020-09-27	7	85.7143	1	0.142857
C3	5	4	2020-09-27	7	57.1429	2	0.285714
C3	6	6	2020-09-27	7	85.7143	1	0.142857
C3	4	0	2020-09-27	7	0	3	0.428571
MycoMillet15	5	4	2020-09-27	7	57.1429	2	0.285714
MycoMillet15	3	1	2020-09-27	7	14.2857	4	0.571429
MycoMillet15	6	4	2020-09-27	7	57.1429	1	0.142857
MycoMillet15	4	1	2020-09-27	7	14.2857	3	0.428571
MycoMillet15	7	5	2020-09-27	7	71.4286	0	0
MycoMillet15	4	4	2020-09-27	7	57.1429	3	0.428571
MycoMillet15	3	2	2020-09-27	7	28.5714	4	0.571429
MycoMillet15	5	0	2020-09-27	7	0	2	0.285714
MycoMillet15	2	1	2020-09-27	7	14.2857	5	0.714286
MycoMillet15	7	4	2020-09-27	7	57.1429	0	0
MycoMillet15	6	1	2020-09-27	7	14.2857	1	0.142857
MycoMillet15	4	1	2020-09-27	7	14.2857	3	0.428571
MycoMillet15	4	0	2020-09-27	7	0	3	0.428571
MycoMillet15	4	0	2020-09-27	7	0	3	0.428571
MycoMillet15	4	0	2020-09-27	7	0	3	0.428571
MycoMillet25	0	0	2020-09-27	7	0	7	1
MycoMillet25	4	3	2020-09-27	7	42.8571	3	0.428571
MycoMillet25	1	1	2020-09-27	7	14.2857	6	0.857143
MycoMillet25	0	0	2020-09-27	7	0	7	1
MycoMillet25	1	1	2020-09-27	7	14.2857	6	0.857143
MycoMillet25	0	0	2020-09-27	7	0	7	1
MycoMillet25	5	4	2020-09-27	7	57.1429	2	0.285714
MycoMillet25	4	3	2020-09-27	7	42.8571	3	0.428571
MycoMillet25	5	4	2020-09-27	7	57.1429	2	0.285714
MycoMillet25	0	0	2020-09-27	7	0	7	1
MycoMillet25	4	2	2020-09-27	7	28.5714	3	0.428571
MycoMillet25	6	6	2020-09-27	7	85.7143	1	0.142857
MycoMillet25	0	0	2020-09-27	7	0	7	1
MycoMillet25	0	0	2020-09-27	7	0	7	1
MycoMillet25	3	2	2020-09-27	7	28.5714	4	0.571429
B.bassiana	0	0	2020-10-01	8	0	7	1
B.bassiana	0	0	2020-10-01	8	0	7	1
B.bassiana	0	0	2020-10-01	8	0	7	1
B.bassiana	2	2	2020-10-01	8	28.5714	5	0.714286
B.bassiana	0	0	2020-10-01	8	0	7	1
B.bassiana	0	0	2020-10-01	8	0	7	1
B.bassiana	0	0	2020-10-01	8	0	7	1
B.bassiana	0	0	2020-10-01	8	0	7	1
B.bassiana	0	0	2020-10-01	8	0	7	1
B.bassiana	0	0	2020-10-01	8	0	7	1
B.bassiana	0	0	2020-10-01	8	0	7	1
B.bassiana	2	0	2020-10-01	8	0	5	0.714286
B.bassiana	0	0	2020-10-01	8	0	7	1
B.bassiana	0	0	2020-10-01	8	0	7	1
B.bassiana	0	0	2020-10-01	8	0	7	1
BotaniGard	3	3	2020-10-01	8	42.8571	4	0.571429
BotaniGard	6	6	2020-10-01	8	85.7143	1	0.142857
BotaniGard	4	3	2020-10-01	8	42.8571	3	0.428571
BotaniGard	0	0	2020-10-01	8	0	7	1
BotaniGard	1	1	2020-10-01	8	14.2857	6	0.857143
BotaniGard	0	0	2020-10-01	8	0	7	1
BotaniGard	5	4	2020-10-01	8	57.1429	2	0.285714
BotaniGard	5	1	2020-10-01	8	14.2857	2	0.285714
BotaniGard	0	0	2020-10-01	8	0	7	1
BotaniGard	4	3	2020-10-01	8	42.8571	3	0.428571
BotaniGard	4	4	2020-10-01	8	57.1429	3	0.428571
BotaniGard	7	4	2020-10-01	8	57.1429	0	0
BotaniGard	4	3	2020-10-01	8	42.8571	3	0.428571
BotaniGard	0	0	2020-10-01	8	0	7	1
BotaniGard	0	0	2020-10-01	8	0	7	1
C1	0	0	2020-10-01	8	0	7	1
C1	1	1	2020-10-01	8	14.2857	6	0.857143
C1	3	3	2020-10-01	8	42.8571	4	0.571429
C1	4	1	2020-10-01	8	14.2857	3	0.428571
C1	5	5	2020-10-01	8	71.4286	2	0.285714
C1	1	1	2020-10-01	8	14.2857	6	0.857143
C1	1	1	2020-10-01	8	14.2857	6	0.857143
C1	0	0	2020-10-01	8	0	7	1
C1	4	3	2020-10-01	8	42.8571	3	0.428571
C1	0	0	2020-10-01	8	0	7	1
C1	4	3	2020-10-01	8	42.8571	3	0.428571
C1	1	0	2020-10-01	8	0	6	0.857143
C1	1	1	2020-10-01	8	14.2857	6	0.857143
C1	0	0	2020-10-01	8	0	7	1
C1	5	2	2020-10-01	8	28.5714	2	0.285714
C2	5	5	2020-10-01	8	71.4286	2	0.285714
C2	6	6	2020-10-01	8	85.7143	1	0.142857
C2	7	5	2020-10-01	8	71.4286	0	0
C2	5	5	2020-10-01	8	71.4286	2	0.285714
C2	4	3	2020-10-01	8	42.8571	3	0.428571
C2	6	6	2020-10-01	8	85.7143	1	0.142857
C2	7	7	2020-10-01	8	100	0	0
C2	5	4	2020-10-01	8	57.1429	2	0.285714
C2	7	6	2020-10-01	8	85.7143	0	0
C2	7	7	2020-10-01	8	100	0	0
C2	6	5	2020-10-01	8	71.4286	1	0.142857
C2	5	4	2020-10-01	8	57.1429	2	0.285714
C2	6	5	2020-10-01	8	71.4286	1	0.142857
C2	7	6	2020-10-01	8	85.7143	0	0
C2	5	5	2020-10-01	8	71.4286	2	0.285714
C3	6	5	2020-10-01	8	71.4286	1	0.142857
C3	6	6	2020-10-01	8	85.7143	1	0.142857
C3	6	6	2020-10-01	8	85.7143	1	0.142857
C3	5	4	2020-10-01	8	57.1429	2	0.285714
C3	6	6	2020-10-01	8	85.7143	1	0.142857
C3	6	5	2020-10-01	8	71.4286	1	0.142857
C3	5	4	2020-10-01	8	57.1429	2	0.285714
C3	6	5	2020-10-01	8	71.4286	1	0.142857
C3	7	6	2020-10-01	8	85.7143	0	0
C3	5	4	2020-10-01	8	57.1429	2	0.285714
C3	7	7	2020-10-01	8	100	0	0
C3	6	6	2020-10-01	8	85.7143	1	0.142857
C3	4	4	2020-10-01	8	57.1429	3	0.428571
C3	6	5	2020-10-01	8	71.4286	1	0.142857
C3	4	0	2020-10-01	8	0	3	0.428571
MycoMillet15	4	4	2020-10-01	8	57.1429	3	0.428571
MycoMillet15	3	1	2020-10-01	8	14.2857	4	0.571429
MycoMillet15	6	4	2020-10-01	8	57.1429	1	0.142857
MycoMillet15	4	3	2020-10-01	8	42.8571	3	0.428571
MycoMillet15	7	6	2020-10-01	8	85.7143	0	0
MycoMillet15	4	4	2020-10-01	8	57.1429	3	0.428571
MycoMillet15	3	2	2020-10-01	8	28.5714	4	0.571429
MycoMillet15	4	0	2020-10-01	8	0	3	0.428571
MycoMillet15	2	1	2020-10-01	8	14.2857	5	0.714286
MycoMillet15	7	4	2020-10-01	8	57.1429	0	0
MycoMillet15	1	1	2020-10-01	8	14.2857	6	0.857143
MycoMillet15	4	4	2020-10-01	8	57.1429	3	0.428571
MycoMillet15	3	0	2020-10-01	8	0	4	0.571429
MycoMillet15	4	1	2020-10-01	8	14.2857	3	0.428571
MycoMillet15	1	0	2020-10-01	8	0	6	0.857143
MycoMillet25	0	0	2020-10-01	8	0	7	1
MycoMillet25	4	3	2020-10-01	8	42.8571	3	0.428571
MycoMillet25	1	1	2020-10-01	8	14.2857	6	0.857143
MycoMillet25	0	0	2020-10-01	8	0	7	1
MycoMillet25	1	1	2020-10-01	8	14.2857	6	0.857143
MycoMillet25	0	0	2020-10-01	8	0	7	1
MycoMillet25	5	4	2020-10-01	8	57.1429	2	0.285714
MycoMillet25	4	2	2020-10-01	8	28.5714	3	0.428571
MycoMillet25	5	4	2020-10-01	8	57.1429	2	0.285714
MycoMillet25	0	0	2020-10-01	8	0	7	1
MycoMillet25	4	4	2020-10-01	8	57.1429	3	0.428571
MycoMillet25	6	6	2020-10-01	8	85.7143	1	0.142857
MycoMillet25	0	0	2020-10-01	8	0	7	1
MycoMillet25	0	0	2020-10-01	8	0	7	1
MycoMillet25	2	2	2020-10-01	8	28.5714	5	0.714286
